# Supplementary figures and images for: Incomplete removal of extracellular glutamate controls synaptic transmission and integration at a cerebellar synapse
Source: eLife journal article supplement (doi:10.7554/elife.63819), 2021-02-22

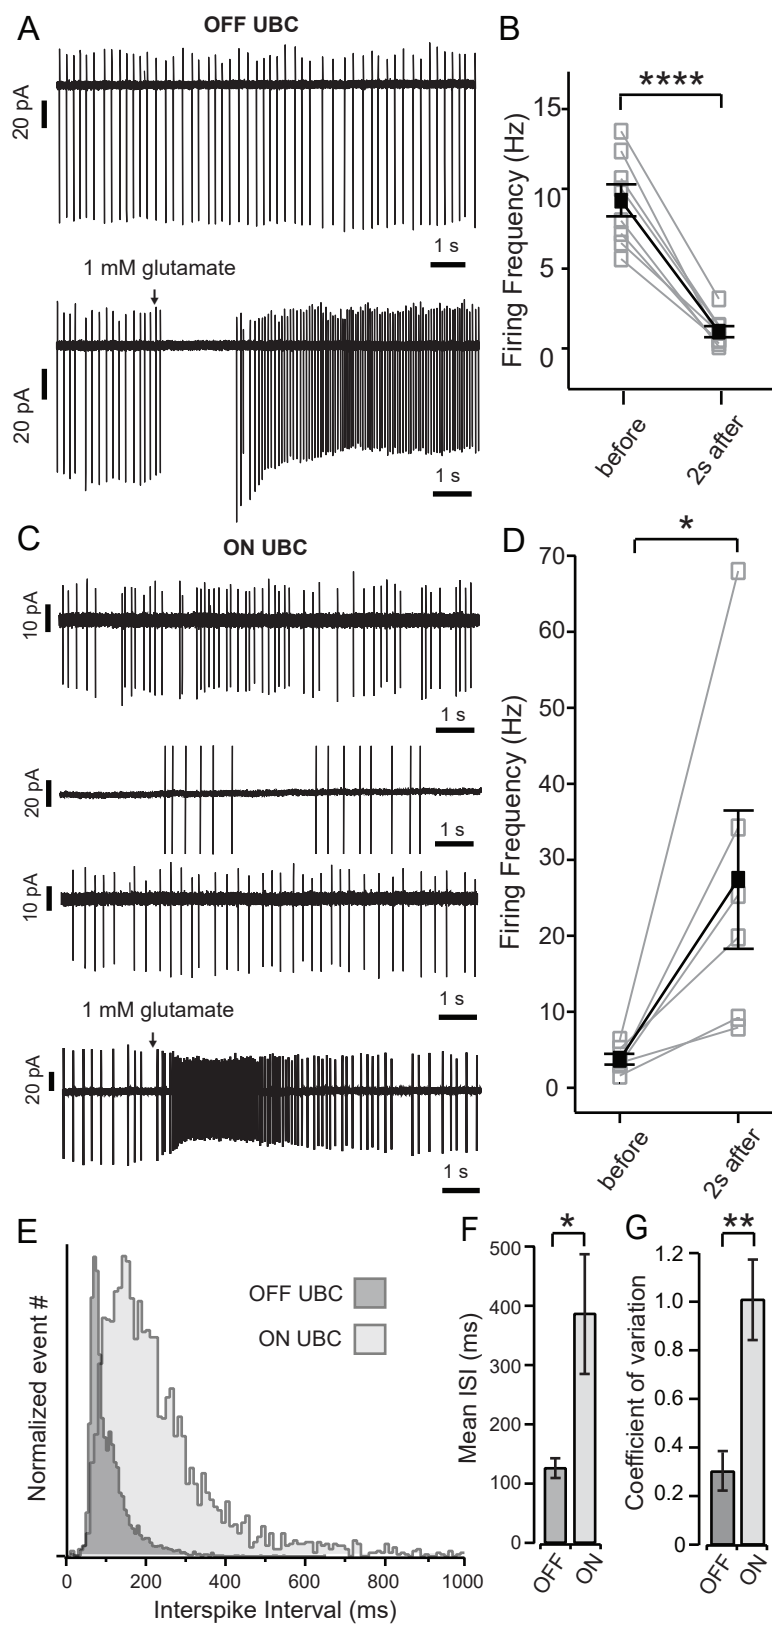

Figure 2 - Figure supplement 2

Supplement: supp [file elife-63819-supp-v1.zip]

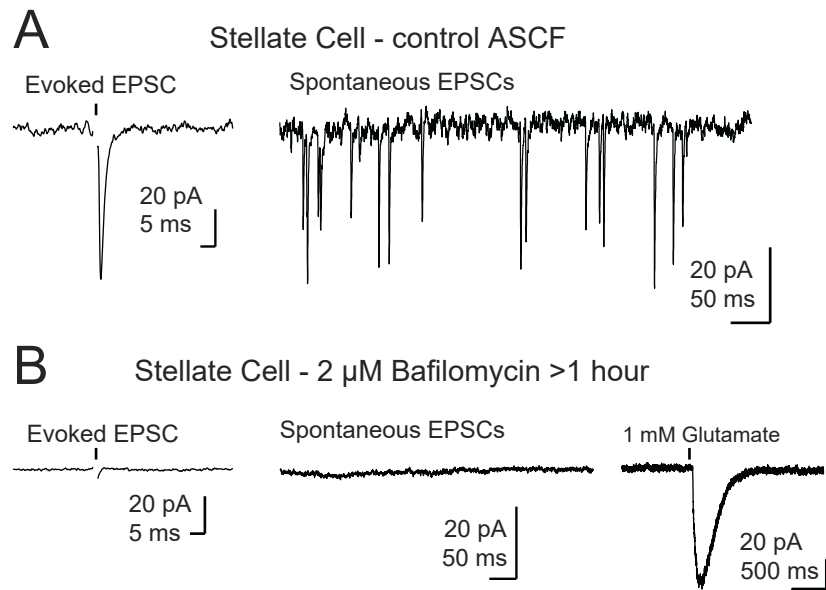

Figure 6 - Figure supplement 1

Supplement: supp [file elife-63819-supp-v1.zip]

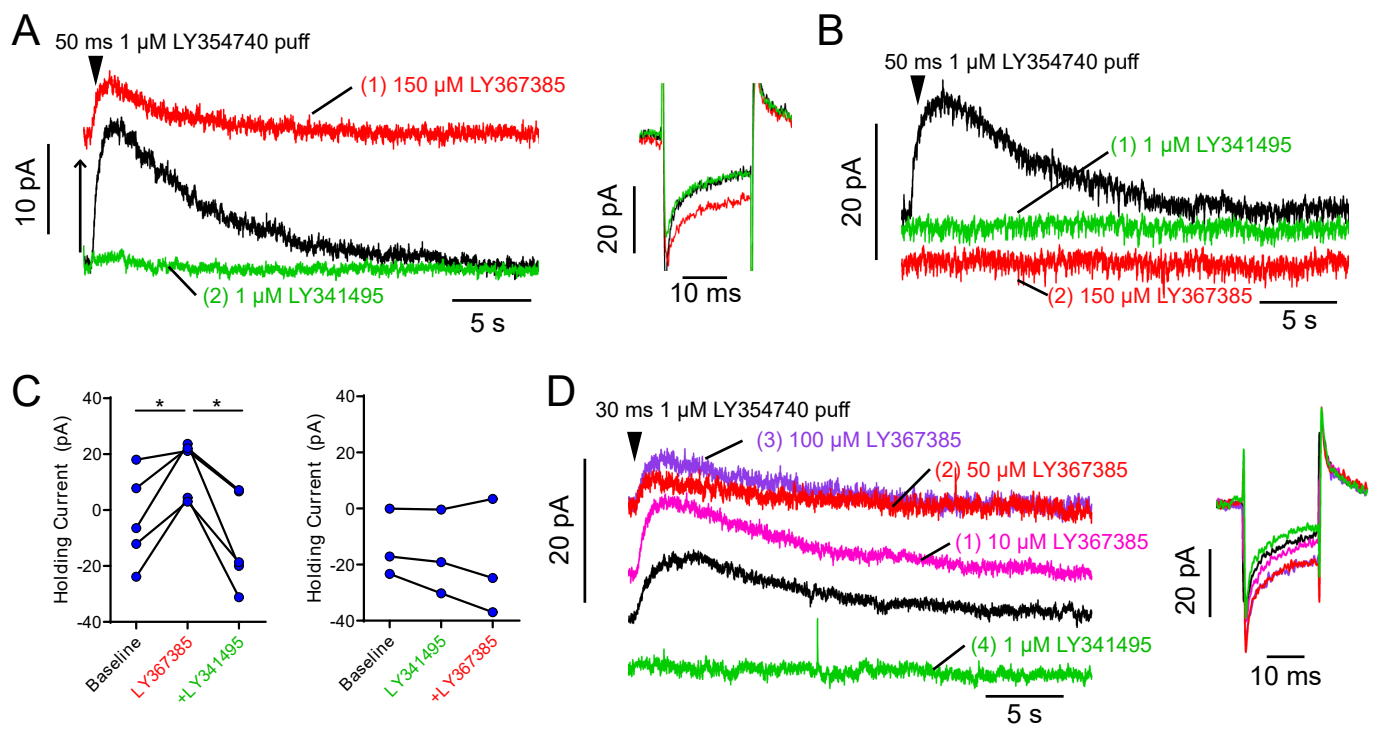

Figure 2 - Figure supplement 1

Supplement: supp [file elife-63819-supp-v1.zip]

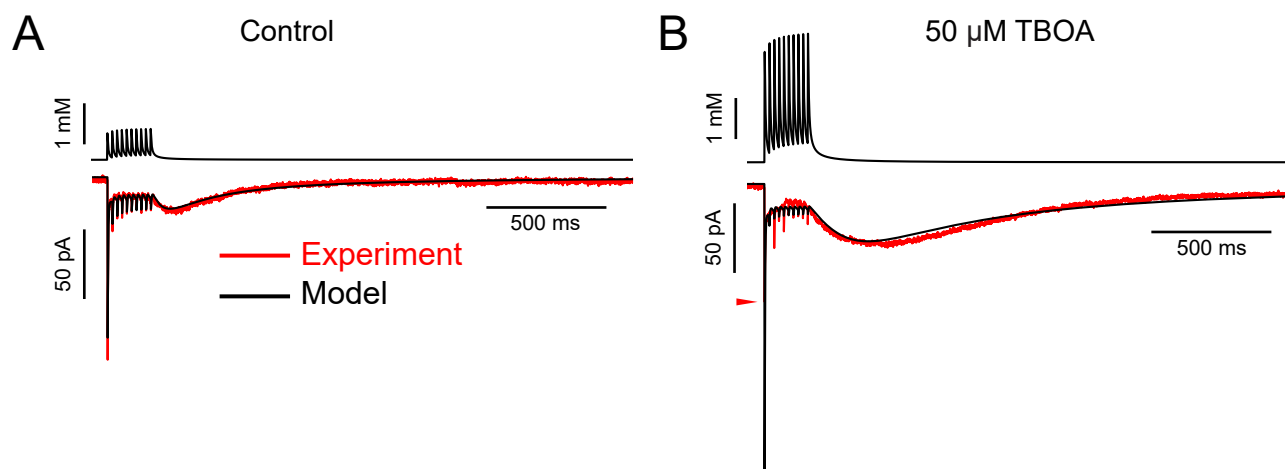

Figure 1 - Figure supplement 3

Supplement: supp [file elife-63819-supp-v1.zip]

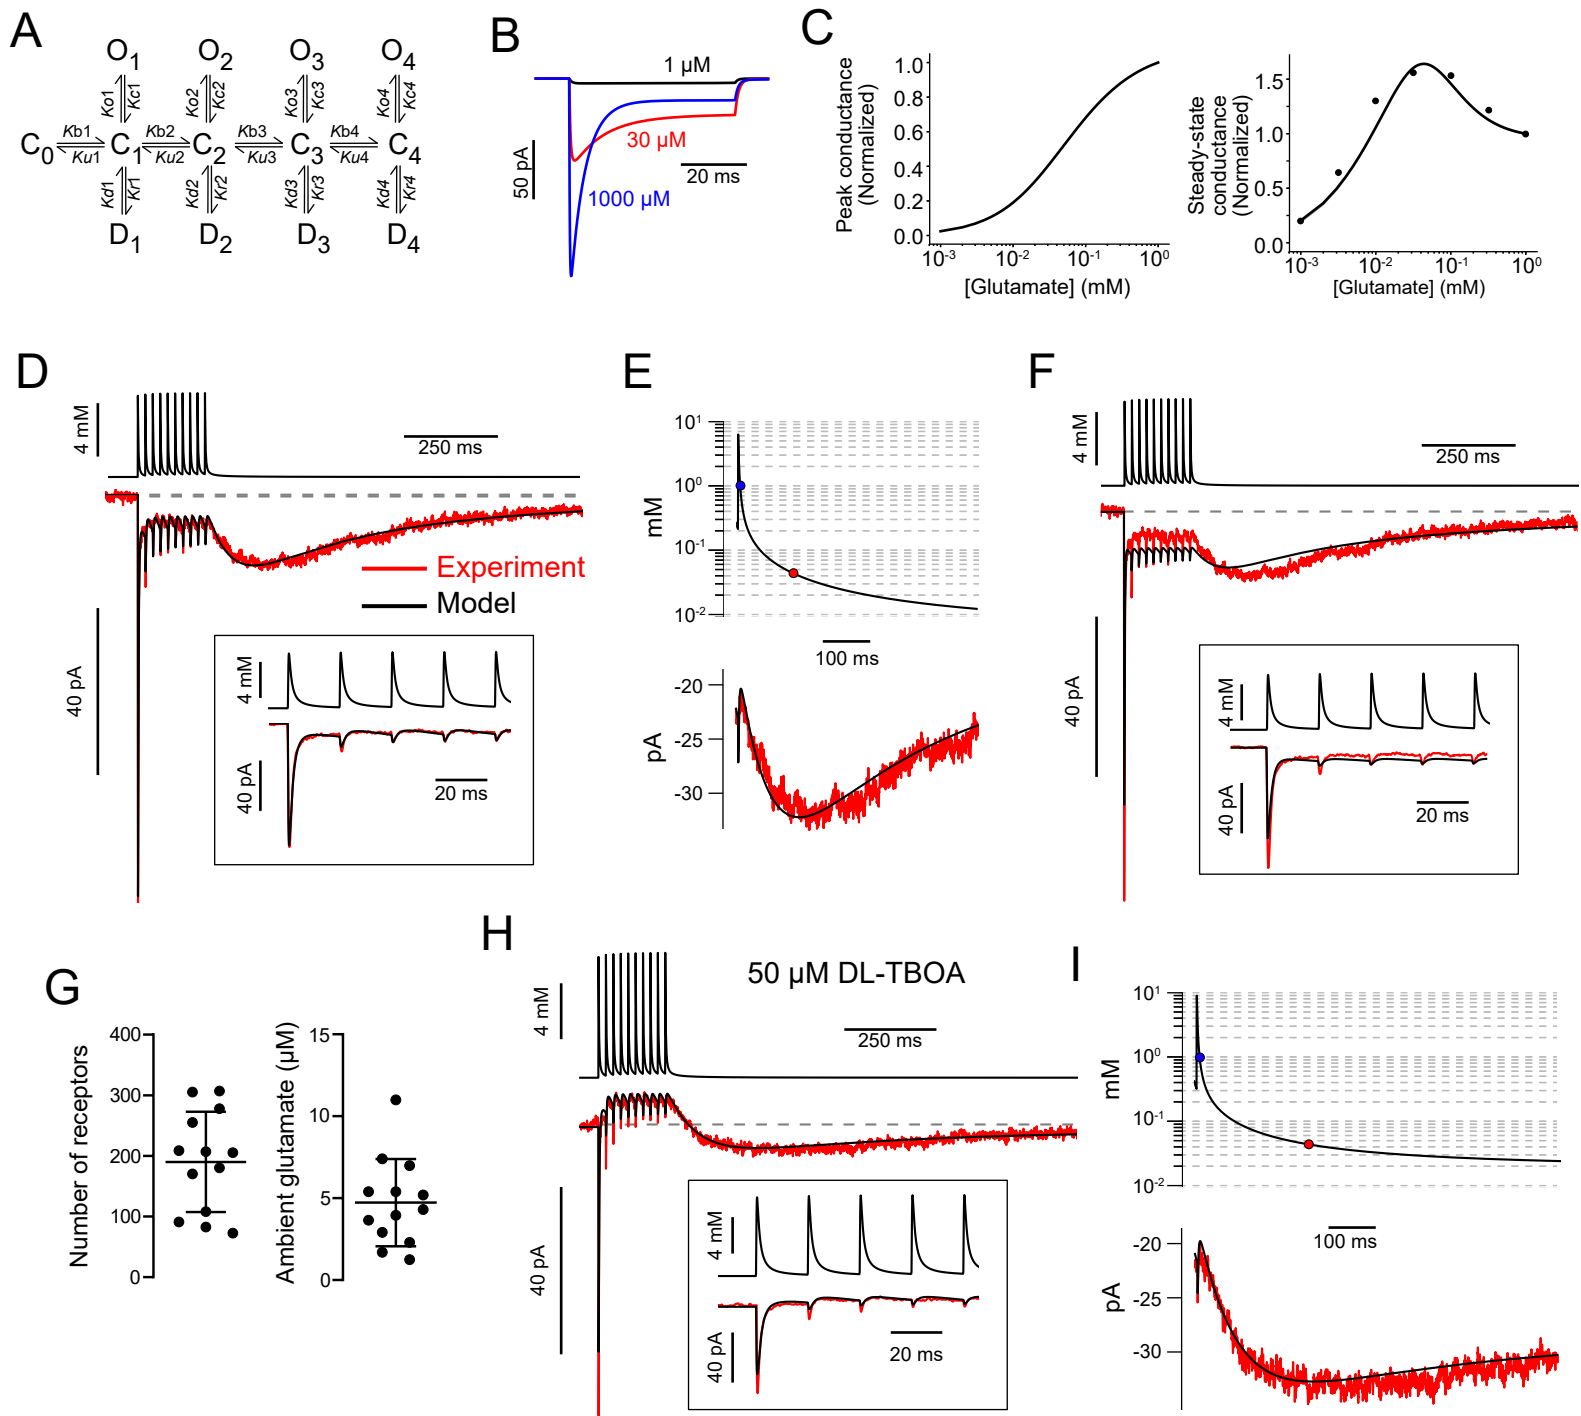

Figure 1 - Figure supplement 2

Supplement: supp [file elife-63819-supp-v1.zip]

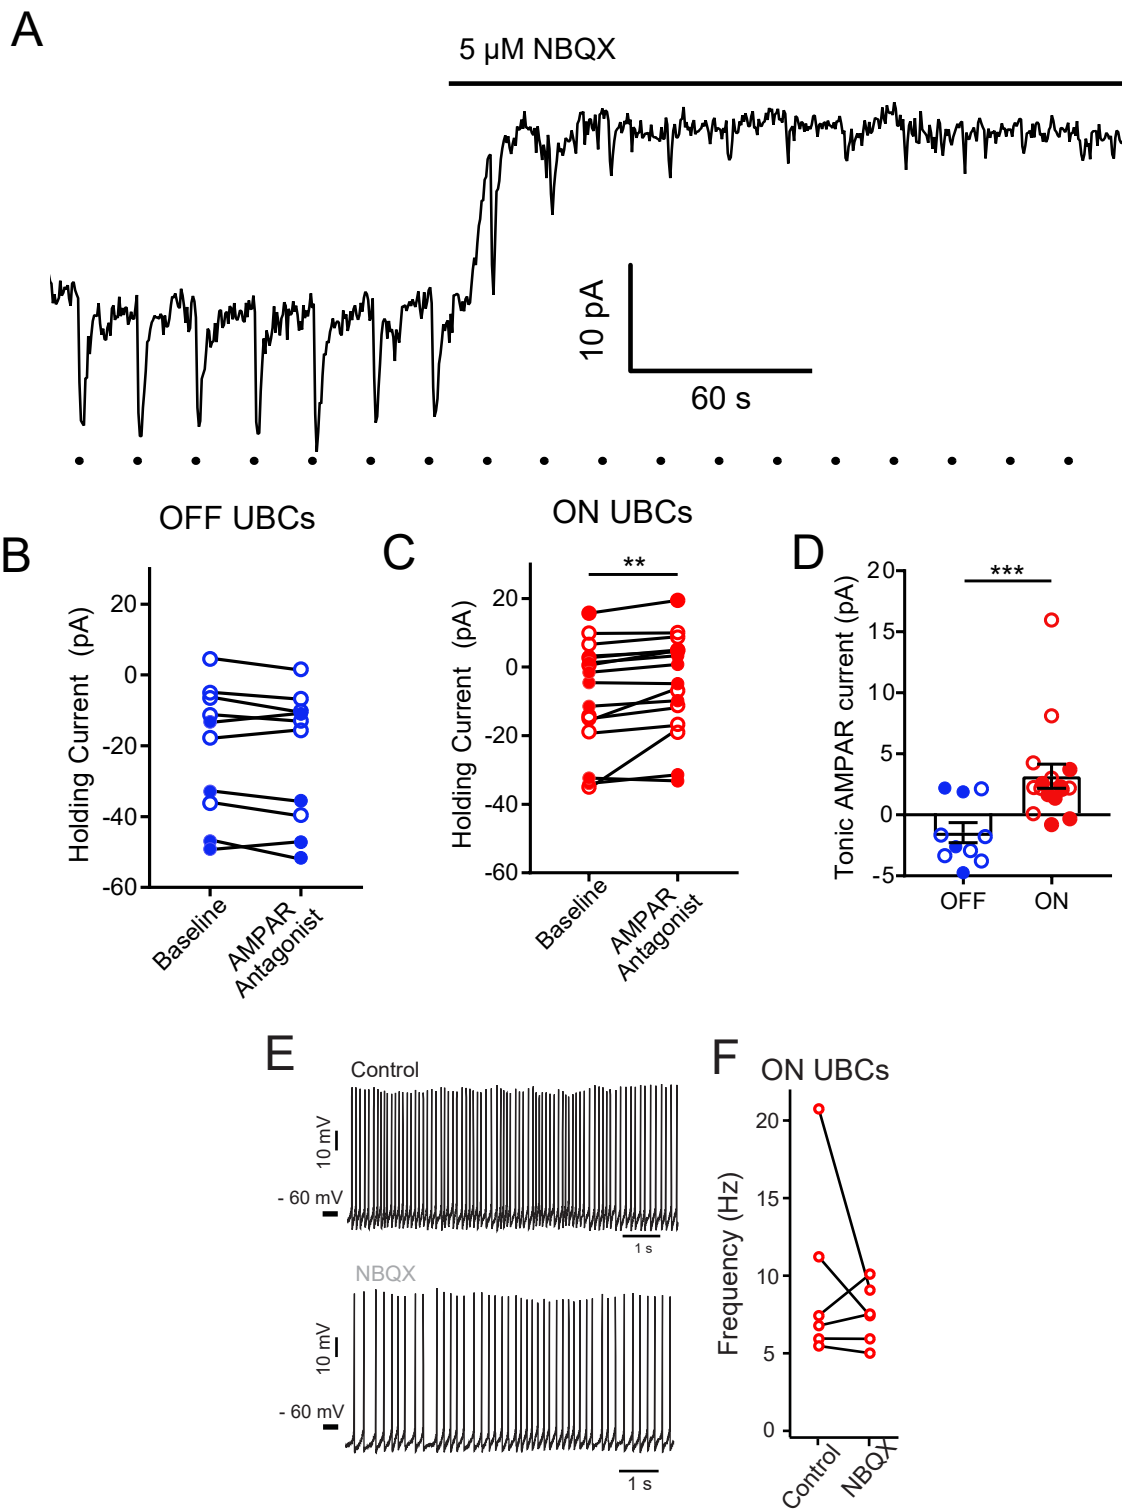

Figure 2 - Figure supplement 3

Supplement: supp [file elife-63819-supp-v1.zip]

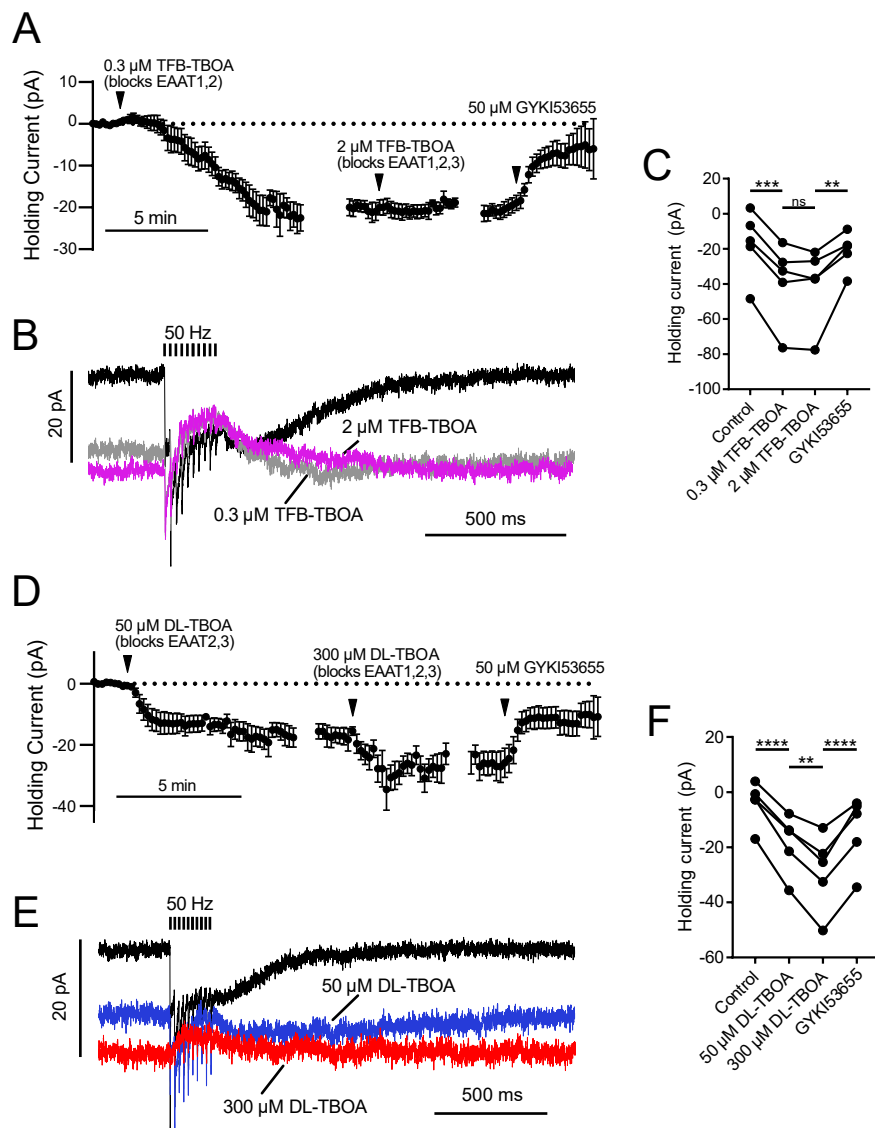

Figure 1 - Figure supplement 1

Supplement: supp [file elife-63819-supp-v1.zip]
